# 1 **Investigating the genetic regulation of the expression of 63 lipid metabolism**

## 2 **genes in the pig skeletal muscle**

3

4 Rayner González-Prendes<sup>a</sup>, Raquel Quintanilla<sup>b</sup>, Marcel Amills<sup>a,c\*</sup>

5

6 <sup>a</sup>Department of Animal Genetics, Center for Research in Agricultural Genomics (CSIC-IRTA-  
7 UAB-UB), Universitat Autònoma de Barcelona, Bellaterra, 08193, Spain. <sup>b</sup>Animal Breeding  
8 and Genetics Program, Institute for Research and Technology in Food and Agriculture (IRTA),  
9 Torre Marimon, Caldes de Montbui 08140, Spain. <sup>c</sup>Departament de Ciència Animal i dels  
10 Aliments, Facultat de Veterinària, Universitat Autònoma de Barcelona, Bellaterra 08193,  
11 Spain.

12

13 \*Corresponding author: Marcel Amills, Department of Animal Genetics, Center for Research  
14 in Agricultural Genomics (CSIC-IRTA-UAB-UB), Universitat Autònoma de Barcelona,  
15 Bellaterra, 08193, Spain. E-mail: [marcel.amills@uab.cat](mailto:marcel.amills@uab.cat). Tel +34 93 5636600

16

17

18 E-mail addresses: Rayner González-Prendes, [rayner.gonzalez@cragenomica.es](mailto:rayner.gonzalez@cragenomica.es); Raquel  
19 Quintanilla, [raquel.quintanilla@irta.cat](mailto:raquel.quintanilla@irta.cat); Marcel Amills, [marcel.amills@uab.cat](mailto:marcel.amills@uab.cat).

20

21

22

23

24 **Abstract**

25

26 Despite their potential involvement in the determination of fatness phenotypes, a  
27 comprehensive and systematic view about the genetic regulation of lipid metabolism genes  
28 is still lacking in pigs. Herewith, we have used a dataset of 104 pigs, with available  
29 genotypes for 62,163 single nucleotide polymorphisms and microarray gene expression  
30 measurements in the *gluteus medius* muscle, to investigate the genetic regulation of 63  
31 genes with crucial roles in the uptake, transport, synthesis and catabolism of lipids. By  
32 performing an eQTL scan with the GEMMA software, we have detected 12 cis- and 18  
33 trans-eQTL modulating the expression of 19 loci. Genes regulated by eQTL had a variety of  
34 functions such as the  $\beta$ -oxidation of fatty acids, lipid biosynthesis and lipolysis, fatty acid  
35 activation and desaturation, lipoprotein uptake, apolipoprotein assembly and cholesterol  
36 trafficking. These data provide a first picture about the genetic regulation of loci involved in  
37 porcine lipid metabolism.

38

39 Keywords: pigs, *gluteus medius*, gene expression, quantitative trait loci, lipid metabolism

40

41

42

43

44

45

46

47 **Main text**

48

49 The search of regulatory variants with causal effects on the expression of genes with  
50 important metabolic roles is fundamental to elucidate the genetic basis of multiple  
51 physiological and pathological phenotypes [1]. In humans, thousands of expression QTL  
52 (eQTL) have been detected so far and the majority of them appear to act locally (cis-eQTL)  
53 rather than influencing the expression of genes located at distant genomic regions or  
54 chromosomes (trans-eQTL) [1,2]. Moreover, around 50% of human cis-eQTL are shared  
55 across distinct tissues, though the consistency in the magnitude and the direction of these  
56 regulatory effects may be variable [2].

57 The genetic regulation of lipid metabolism genes has been poorly studied in pigs in  
58 spite of the fact that it may have a potential impact on the phenotypic variation of fatness  
59 traits. Indeed, the majority of eQTL studies performed in pigs have targeted either genes  
60 whose expression correlates with lipid phenotypes or loci comprised within the confidence  
61 intervals of fatness quantitative trait loci [3–7]. At present, we do not know if porcine lipid  
62 genes are predominantly regulated in cis- or trans- and if such regulation is featured by  
63 single or multiple polymorphisms. The goal of the current work was to shed light into these  
64 issues by identifying eQTL with effects on the muscle expression of 63 genes with an  
65 established role in the uptake, transport, synthesis and catabolism of lipids.

66 As animal material, we have used 104 barrows from a commercial Duroc porcine  
67 line (Lipgen population) distributed in five half-sib families. After weaning, this pig  
68 population was transferred to the experimental test station at the Centre de Control Porcí of  
69 the Institut de Recerca i Tecnologia Agroalimentàries (IRTA). A detailed description of the

70 experimental population and management conditions has been reported [8,9]. Barrows were  
71 slaughtered at an approximate age of 190 days. *Gluteus medius* (GM) muscle biopsies were  
72 obtained in the abattoir and they were immediately frozen in liquid nitrogen, being  
73 subsequently stored at -80 °C. All animal care and management procedures followed the  
74 ARRIVE guidelines [10] and they were approved by the Ethical Committee of the Institut  
75 de Recerca i Tecnologia Agroalimentàries (IRTA).

76 GeneChip Porcine Genomic arrays (Affymetrix, Inc., Santa Clara, CA) were used to  
77 measure gene expression in GM samples from the 104 Duroc pigs mentioned above (data  
78 are available in the Gene Expression Omnibus public repository of the National Center for  
79 Biotechnology Information, accession number: GSE19275). Data pre-processing and  
80 normalization were carried out with the BRB-ArrayTools software version 3.7.1.[11]. Genes  
81 displaying more than 20% of expression values over  $\pm 1.5$  times the median expression of all  
82 arrays were retained for further analysis. A detailed description of the techniques and  
83 methods used to perform RNA purification and microarray hybridization can be found in  
84 [12]. Finally, sixty three loci annotated in the Ensembl (S.scrofa 10.2) database and having a  
85 well established role in lipid metabolism (Supplementary Table 1) were selected for further  
86 analysis.

87 The Porcine SNP60K BeadChip (Illumina, San Diego, CA) was employed to  
88 genotype 62,163 single nucleotide polymorphisms (SNPs) in the 104 Duroc pigs by  
89 following a previously reported protocol [5]. The GenomeStudio software (Illumina) was  
90 employed to evaluate the quality of the typing data. By using PLINK [13], we discarded  
91 SNPs with rates of missing genotypes above 10%, minor allele frequencies (MAF) below  
92 5%, as well as those did not conform Hardy-Weinberg expectations (threshold set at a *P*-

93 value of 0.001). Markers that did not map to the porcine reference genome (Sscrofa10.2  
94 assembly) and those located in sex chromosomes were also eliminated from the data set.  
95 Moreover, were eliminated SNPs that were in complete linkage disequilibrium ( $r^2 > 0.98$ ).  
96 After these filtering steps, a total of 28,571 SNPs were used to carry out a GWAS analysis  
97 for gene expression phenotypes.

98 Statistical analyses were performed with the GEMMA software [14] that uses a  
99 standard linear mixed model and an exact test of significance to identify associations  
100 between genotypes and phenotypes. The existence of population structure is taken into  
101 account by considering a relatedness matrix [14]. The model assumed in the statistical  
102 analysis was:

103

$$104 \quad \mathbf{y}_{ijklm} = \boldsymbol{\mu} + \mathbf{batch}_j + \mathbf{lab}_k + \delta \mathbf{g}_l + \mathbf{e}_{ijklm}$$

105

106 where  $\mathbf{y}_{ijklm}$  is the vector that describes the mRNA levels of each gene in the GM muscle  
107 of the  $i^{th}$  individual;  $\boldsymbol{\mu}$  is the mean mRNA expression of each gene in the population;  $\mathbf{batch}_j$   
108 and  $\mathbf{lab}_k$  are the systematic effects i.e. "batch of fattening" (with 4 categories) and  
109 "laboratory" (microarray data were produced in two distinct laboratories);  $\delta$  is the SNP  
110 allelic effect estimated as a regression coefficient on the corresponding  $\mathbf{g}_l$  genotype (values -  
111 1, 0, 1) of the  $l^{th}$  SNP; and  $\mathbf{e}_{ijklm}$  is the residual effect. Correction for multiple testing was  
112 implemented with a false discovery rate approach [15] and SNPs with a q-value  $\leq 0.05$  were  
113 considered as significantly associated with gene expression. In the analysis of cis-eQTL,  
114 multiple testing was corrected by taking into consideration the number of SNPs contained  
115 within 2 Mb windows around each gene, while in the trans-eQTL analysis we took into  
116 account the whole set of 28,571 SNPs.

117           The eQTL scan for lipid-related genes made possible to identify 12 cis-eQTL and 18  
118 trans-eQTL influencing the mRNA levels of 19 loci (Tables 1 and 2, Figure 1). As shown in  
119 Table 1, the two cis-eQTL detected for the *ACOX3* (SSC8: 2.7-3.7 Mb and 4.4 Mb) and  
120 *NPC2* (SSC7: 102.5-103.1 Mb and 104.1-104.4 Mb) genes were located in adjacent  
121 positions and they might correspond to two genetic determinants (instead of 4). In a  
122 previous study, Chen et al. [16] identified 120 cis-eQTLs and 523 trans-eQTLs with effects  
123 on porcine hepatic gene expression. However, they focused their study on a dataset of 300-  
124 400 genes that showed significant correlations with traits under study and their sample size  
125 was larger than ours. In the current work, the numbers of cis- and trans-eQTL for lipid genes  
126 were quite similar (Tables 1 and 2). In contrast, Cánovas et al.[12] performed a genome scan  
127 for porcine muscle expression phenotypes and observed a predominance of trans- vs cis-  
128 eQTL. The most likely reason for this discrepancy is that we have used different thresholds  
129 of significance to correct for multiple testing in the cis- and trans-eQTL analyses. Indeed, in  
130 humans the majority of eQTL identified so far act in cis-. For instance, a recent eQTL scan  
131 in 869 lymphoblastoid cell lines revealed that 3,534 and 48 genes were affected by eQTL in  
132 cis- and trans-, respectively [17]. Similarly, a global analysis of 53 datasets demonstrated the  
133 existence of 116,563 high confidence eQTL [18]. Around 91% and 9% of these eQTL acted  
134 in cis- and trans-, respectively [18], and there was an average of 1.8 eQTL per gene.

135           The majority of trans-eQTL detected by us resided in chromosomes different than  
136 the one containing the targeted gene, suggesting that they may exert their effects through  
137 SNPs that alter the synthesis or structure of a diffusible factor. We also observed the  
138 existence of several genes (*e.g.* *ACADS* and *SLC25A17*) simultaneously regulated by eQTL  
139 in cis- and in trans- (Tables 1 and 2). Particularly relevant is the case of the *ACADS* gene,

140 whose expression was modulated by one and four cis- and trans-eQTL, respectively. This  
141 finding illustrates that even simple phenotypes, such as gene expression, can be regulated in  
142 a highly complex manner.

143 From a functional point of view, this set of 12 cis- and 18 trans-eQTL regulated the  
144 expression of genes integrated in distinct metabolic pathways. In this way, the acyl-  
145 coenzyme A dehydrogenases for short-chain (*ACADS*), medium-chain (*ACADM*) and long-  
146 chain (*ACADL*) FA catalyse the first step in the FA  $\beta$ -oxidation pathway, and the enoyl-CoA  
147 delta isomerase 2 (*ECI2*) gene plays an essential role in the  $\beta$ -oxidation of unsaturated FA.  
148 Moreover, the solute carrier family 25 member 17 (*SLC25A17*) gene encodes a peroxisomal  
149 transporter of coenzyme-A, FAD and  $\text{NAD}^+$  cofactors [19] and it could have a role in the  $\alpha$ -  
150 oxidation of FA [20]. We have also detected eQTL for genes comprised in lipid biosynthetic  
151 pathways (Tables 1 and 2). For instance, the glycerol-3-phosphate acyltransferase 3 (*GPAT3*)  
152 is involved in the synthesis of triacylglycerols [21], and the 3-hydroxy-3-methylglutaryl-  
153 CoA synthase 1 (*HMGCS1*) enzyme is a component of the cholesterol biosynthetic pathway  
154 [22]. Other relevant loci are the acyl-CoA synthetase family member 2 (*ACSF2*) gene,  
155 which may participate in FA activation [23], the *LACTB* gene that affects adiposity in mice  
156 females [23], the CCAAT/enhancer binding protein  $\delta$  (*CEBPD*) gene that has a key role in  
157 the regulation of adipogenesis [24] and the Cbp/P300 interacting transactivator with  
158 Glu/Asp rich carboxy-terminal domain 2 (*CITED2*) locus that is involved in the regulation  
159 of hepatic gluconeogenesis[25].

160

## 161 **Conclusions**

162

163 Our results demonstrate that around 30% of the lipid-related genes analysed in the  
164 current work are regulated by cis- and/or trans-eQTL with significant effects on their mRNA  
165 levels. In our data set, we have not detected a clear predominance of either cis- or trans-  
166 regulatory factors in the determination of gene expression, a result that contrasts with what  
167 has been obtained in humans where gene regulation is mostly exerted by cis-factors. In the  
168 next future, it would be worth to investigate if the set of eQTL detected herewith displays  
169 significant associations with the phenotypic variation of porcine traits of economic interest.

170

## 171 **Funding**

172

173 Part of the research presented in this publication was funded by grants AGL2013-48742-C2-  
174 1-R and AGL2013-48742-C2-2-R awarded by the Spanish Ministry of Economy and  
175 Competitiveness. We also acknowledge the support of the Spanish Ministry of Economy and  
176 Competitiveness for the *Center of Excellence Severo Ochoa 2016-2019* (SEV-2015-0533)  
177 grant awarded to the Center for Research in Agricultural Genomics. Gonzalez-Prendes R.  
178 was funded by a FPU Ph.D. grant from the Spanish Ministerio de Educación  
179 (FPU12/00860). Thanks also to the CERCA Programme of the Generalitat de Catalunya.

180 The authors are indebted to *Selección Batallé S.A.* for providing the animal material. Thanks  
181 also to Angela Cánovas for her advice in the bioinformatic analyses of gene expression.

182

## 183 **References**

184

185 1. Nica AC, Dermitzakis ET. Expression quantitative trait loci: present and future. *Philos.*



- 186 Trans. R. Soc. Lond. B. Biol. Sci. 2013;368:20120362.
- 187 2. GTEx Consortium. Human genomics. The Genotype-Tissue Expression (GTEx) pilot  
188 analysis: multitissue gene regulation in humans. *Science*. 2015;348:648–60.
- 189 3. Cánovas A, Pena RN, Gallardo D, Ramírez O, Amills M, Quintanilla R. Segregation of  
190 regulatory polymorphisms with effects on the gluteus medius transcriptome in a purebred  
191 pig population. *PLoS One*. 2012;7:e35583.
- 192 4. Heidt H, Cinar MU, Uddin MJ, Looft C, Jüngst H, Tesfaye D, et al. A genetical genomics  
193 approach reveals new candidates and confirms known candidate genes for drip loss in a  
194 porcine resource population. *Mamm. Genome*. 2013;24:416–26.
- 195 5. Manunza A, Casellas J, Quintanilla R, González-Prendes R, Pena RN, Tibau J, et al. A  
196 genome-wide association analysis for porcine serum lipid traits reveals the existence of age-  
197 specific genetic determinants. *BMC Genomics*. 2014;15:758.
- 198 6. Steibel JP, Bates RO, Rosa GJM, Tempelman RJ, Rilington VD, Ragavendran A, et al.  
199 Genome-wide linkage analysis of global gene expression in loin muscle tissue identifies  
200 candidate genes in pigs. *PloS One*. 2011;6:e16766.
- 201 7. Wimmers K, Murani E, Ponsuksili S. Functional genomics and genetical genomics  
202 approaches towards elucidating networks of genes affecting meat performance in pigs. *Brief.*  
203 *Funct. Genomics*. 2010;9:251–8.
- 204 8. Gallardo D, Pena RN, Amills M, Varona L, Ramírez O, Reixach J, et al. Mapping of  
205 quantitative trait loci for cholesterol, LDL, HDL, and triglyceride serum concentrations in

- 206 pigs. *Physiol. Genomics*. 2008;35:199–209.
- 207 9. Gallardo D, Quintanilla R, Varona L, Díaz I, Ramírez O, Pena RN, et al. Polymorphism  
208 of the pig acetyl-coenzyme A carboxylase  $\alpha$  gene is associated with fatty acid composition  
209 in a Duroc commercial line. *Anim. Genet.* 2009;40:410–17.
- 210 10. Kilkenny C, Browne WJ, Cuthill IC, Emerson M, Altman DG. Improving bioscience  
211 research reporting: The ARRIVE guidelines for reporting animal research. *PLoS Biol.*  
212 2010;8:e1000412.
- 213 11. Xu X, Zhao Y, Simon R. Gene Set Expression Comparison kit for BRB-ArrayTools.  
214 *Bioinformatics*. 2008;24:137–9.
- 215 12. Cánovas A, Quintanilla R, Amills M, Pena RN. Muscle transcriptomic profiles in pigs  
216 with divergent phenotypes for fatness traits. *BMC Genomics*. 2010;11:372.
- 217 13. Purcell S, Neale B, Todd-Brown K, Thomas L, Ferreira MAR, Bender D, et al. PLINK:  
218 a tool set for whole-genome association and population-based linkage analyses. *Am. J. Hum.*  
219 *Genet.* 2007;81:559–75.
- 220 14. Zhou X, Stephens M. Genome-wide efficient mixed-model analysis for association  
221 studies. *Nat. Genet.* 2012;44:821–4.
- 222 15. Benjamini Y, Hochberg Y. Controlling the false discovery rate: a practical and powerful  
223 approach to multiple testing. *J. R. Stat. Soc. Ser. B Methodol.* 1995;57:289–300.
- 224 16. Chen C, Yang B, Zeng Z, Yang H, Liu C, Ren J, et al. Genetic dissection of blood lipid  
225 traits by integrating genome-wide association study and gene expression profiling in a

- 226 porcine model. *BMC Genomics*. 2013;14:848.
- 227 17. Bryois J, Buil A, Evans DM, Kemp JP, Montgomery SB, Conrad DF, et al. Cis and trans  
228 effects of human genomic variants on gene expression. *PLoS Genet*. 2014;10:e1004461.
- 229 18. Zhang X, Gierman HJ, Levy D, Plump A, Dobrin R, Goring HH, et al. Synthesis of 53  
230 tissue and cell line expression QTL datasets reveals master eQTLs. *BMC Genomics*.  
231 2014;15:532.
- 232 19. Agrimi G, Russo A, Scarcia P, Palmieri F. The human gene *SLC25A17* encodes a  
233 peroxisomal transporter of coenzyme A, FAD and NAD<sup>+</sup>. *Biochem. J*. 2012;443:241–7.
- 234 20. Van Veldhoven PP. Biochemistry and genetics of inherited disorders of peroxisomal fatty  
235 acid metabolism. *J. Lipid Res*. 2010;51:2863–95.
- 236 21. Yamashita A, Hayashi Y, Matsumoto N, Nemoto-Sasaki Y, Oka S, Tanikawa T, et al.  
237 Glycerophosphate/Acylglycerophosphate Acyltransferases. *Biology*. 2014;3:801–30.
- 238 22. Medina MW, Krauss RM. Alternative splicing in the regulation of cholesterol  
239 homeostasis. *Curr. Opin. Lipidol*. 2013;24:147–52.
- 240 23. Yang X, Deignan JL, Qi H, Zhu J, Qian S, Zhong J, et al. Validation of candidate causal  
241 genes for obesity that affect shared metabolic pathways and networks. *Nat. Genet*.  
242 2009;41:415–23.
- 243 24. Hishida T, Nishizuka M, Osada S, Imagawa M. The role of C/EBPdelta in the early  
244 stages of adipogenesis. *Biochimie*. 2009;91:654–7.
- 245 25. Sakai M, Matsumoto M, Tujimura T, Yongheng C, Noguchi T, Inagaki K, et al. *CITED2*

246 links hormonal signaling to PGC-1 $\alpha$  acetylation in the regulation of gluconeogenesis. Nat.  
247 Med. 2012;18:612–7.

**Figure 1.** Plots of cis-eQTLs (left panel) regulating *ACADS*, *SLC25A17* and *NPC2* mRNA levels and of trans-eQTLs (right panel) influencing the expression of the *ACADS*, *ACDL* and *ACFS2* loci. The x-axis represents the chromosomal region containing the eQTL (measured in Mb), and the y-axis shows the  $-\log_{10}$  (P-value) of the associations found. The horizontal line indicates the threshold of significance (q-value  $\leq 0.05$ ). Vertical lines in left panel plots depict the genomic location of the *ACADS*, *SLC25A17* and *NPC2* genes.

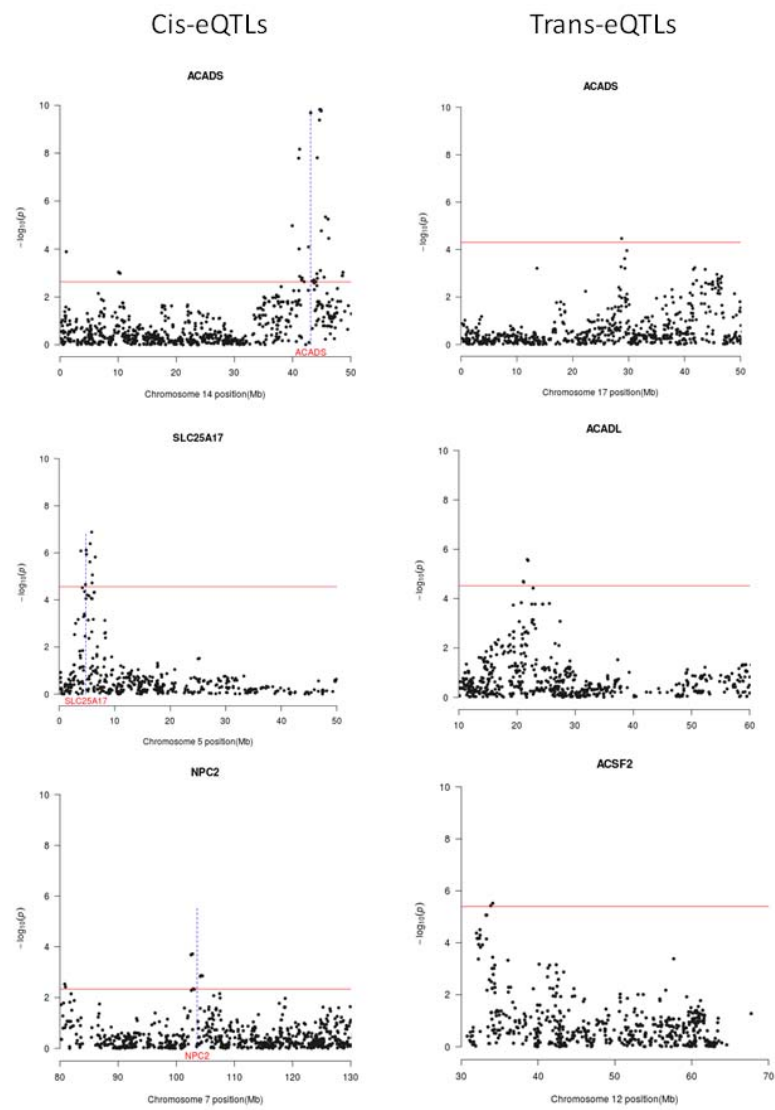

Table 1. Cis-eQTLs regulating the expression of 10 genes involved in porcine lipid metabolism<sup>1</sup>.

| Genes           |     |               | Cis-eQTL |    |             |             |         |         |      |                 |    |      |
|-----------------|-----|---------------|----------|----|-------------|-------------|---------|---------|------|-----------------|----|------|
| Symbol          | SSC | Location (Mb) | SSC      | N  | SNP         | Region (Mb) | P-value | q-value | B    | $\delta \pm SE$ | A1 | MAF  |
| <i>ACADS</i>    | 14  | 43.1          | 14       | 34 | MARC0094155 | 42.6-45.9   | 0.00    | 0.00    | 0.00 | -0.62 ± 0.08    | A  | 0.21 |
| <i>ACOX3</i>    | 8   | 4.3-4.4       | 8        | 1  | ALGA0118448 | 4.4         | 0.00    | 0.00    | 0.00 | -0.75 ± 0.18    | A  | 0.08 |
|                 |     |               |          | 2  | M1GA0025674 | 2.7-3.7     | 0.00    | 0.02    | 0.03 | -0.34 ± 0.10    | A  | 0.36 |
| <i>CITED2</i>   | 1   | 28.2          | 1        | 4  | MARC0028659 | 26.5-27.4   | 0.01    | 0.02    | 0.07 | 0.27 ± 0.10     | A  | 0.38 |
| <i>HMGCS1</i>   | 16  | 29.4          | 16       | 18 | ALGA0089927 | 28.0-29.8   | 0.01    | 0.02    | 0.14 | 0.23 ± 0.07     | G  | 0.35 |
| <i>LRP6</i>     | 5   | 63.5-63.6     | 5        | 20 | ASGA0025668 | 62.2-63.8   | 0.00    | 0.02    | 0.13 | 0.42 ± 0.13     | A  | 0.40 |
| <i>LIPA</i>     | 14  | 110.1         | 14       | 10 | ASGA0065584 | 108.8-109.9 | 0.01    | 0.04    | 0.14 | 0.27 ± 0.11     | G  | 0.19 |
| <i>NCOA1</i>    | 3   | 121.2-121.3   | 3        | 3  | MARC0003746 | 120.0-120.4 | 0.00    | 0.02    | 0.05 | -0.28 ± 0.08    | A  | 0.27 |
| <i>NPC2</i>     | 7   | 103.5         | 7        | 3  | INRA0027651 | 104.1-104.4 | 0.00    | 0.01    | 0.04 | 0.28 ± 0.09     | A  | 0.28 |
|                 |     |               |          | 6  | ALGA0043923 | 102.5-103.1 | 0.00    | 0.00    | 0.00 | 0.33 ± 0.07     | A  | 0.26 |
| <i>SLC25A17</i> | 5   | 4.8           | 5        | 27 | H3GA0015347 | 2.7-5.9     | 0.00    | 0.00    | 0.00 | -0.79 ± 0.15    | G  | 0.30 |
| <i>VLDLR</i>    | 1   | 245.0         | 1        | 1  | ASGA0005756 | 244.9       | 0.00    | 0.04    | 0.04 | -0.33 ± 0.13    | A  | 0.20 |

<sup>1</sup>SSC: porcine chromosome, N: Number of SNPs significantly associated with traits under study, SNP: SNPs displaying the most significant associations with traits under study, Region (Mb): regions containing SNPs significantly associated with traits under study, P-value: nominal P-value, q-value: q-value calculated with a false discovery rate approach, B : Bonferroni-corrected P-value,  $\delta$ : allelic effect and its standard error (SE), A1: minority allele, MAF: frequency of the minority allele.

Table 2. Trans-eQTLs regulating the expression of 12 genes involved in porcine lipid metabolism<sup>1</sup>.

| Genes           |     |               | Trans-eQTLs |    |             |             |         |         |      |                  |    |      |
|-----------------|-----|---------------|-------------|----|-------------|-------------|---------|---------|------|------------------|----|------|
| Symbol          | SSC | Location (Mb) | SSC         | N  | SNP         | Region (Mb) | P-value | q-value | B    | $\delta \pm SE$  | A1 | MAF  |
| <i>ACADL</i>    | 15  | 124.7-124.7   | 3           | 1  | MARC0017993 | 144.3-144.3 | 0.00    | 0.03    | 0.08 | $-0.58 \pm 0.13$ | A  | 0.18 |
|                 |     |               |             | 2  | ALGA0123606 | 21.7-21.8   | 0.00    | 0.03    | 0.07 | $-0.58 \pm 0.13$ | A  | 0.18 |
| <i>ACADM</i>    | 6   | 127.5-127.5   | 13          | 7  | DIAS0003141 | 141.6-144.1 | 0.00    | 0.04    | 0.21 | $-0.72 \pm 0.15$ | A  | 0.12 |
|                 |     |               |             | 9  | MARC0004327 | 29.5-29.5   | 0.00    | 0.04    | 0.34 | $-0.56 \pm 0.12$ | A  | 0.22 |
| <i>ACADS</i>    | 14  | 43.1-43.1     | 17          | 1  | INRA0053259 | 28.7-28.7   | 0.00    | 0.05    | 0.97 | $-0.46 \pm 0.09$ | A  | 0.45 |
|                 |     |               |             | 14 | H3GA0040210 | 53.7-55.5   | 0.00    | 0.00    | 0.02 | $-0.48 \pm 0.08$ | G  | 0.28 |
|                 |     |               |             | 12 | M1GA0017106 | 58.9-59.4   | 0.00    | 0.02    | 0.24 | $-0.54 \pm 0.12$ | G  | 0.12 |
|                 |     |               |             | 3  | MARC0039787 | 134.6-134.6 | 0.00    | 0.01    | 0.19 | $-0.47 \pm 0.11$ | G  | 0.18 |
| <i>ACSF2</i>    | 12  | 26.8-26.8     | 12          | 4  | MARC0030253 | 33.2-34.0   | 0.00    | 0.01    | 0.09 | $-0.49 \pm 0.10$ | A  | 0.50 |
| <i>APOA1</i>    | 9   | 49.2-49.2     | 1           | 3  | MARC0004843 | 181.0-183.7 | 0.00    | 0.01    | 0.01 | $1.02 \pm 0.19$  | G  | 0.07 |
| <i>CEBPD</i>    | 4   | 87.3-87.3     | 7           | 1  | ALGA0045624 | 128.5-128.5 | 0.00    | 0.04    | 0.04 | $1.30 \pm 0.25$  | G  | 0.04 |
| <i>CMIP</i>     | 6   | 7.1-7.2       | 5           | 2  | ASGA0103424 | 12.4-12.7   | 0.00    | 0.04    | 0.36 | $0.59 \pm 0.13$  | G  | 0.06 |
|                 |     |               |             | 13 | DIAS0003141 | 141.6-144.1 | 0.00    | 0.00    | 0.00 | $0.58 \pm 0.09$  | A  | 0.12 |
| <i>ECI2</i>     | 7   | 2.5-2.5       | 12          | 1  | MARC0021670 | 37.0-37.0   | 0.00    | 0.03    | 0.03 | $-0.62 \pm 0.13$ | G  | 0.16 |
| <i>GPAT3</i>    | 8   | 144.2-144.2   | 17          | 1  | H3GA0049617 | 61.6-61.6   | 0.00    | 0.05    | 0.18 | $0.65 \pm 0.14$  | G  | 0.22 |
| <i>LACTB</i>    | 1   | 120.1-120.1   | 15          | 2  | MARC0020666 | 3.2-3.4     | 0.00    | 0.05    | 0.08 | $-0.62 \pm 0.14$ | A  | 0.13 |
| <i>LRP6</i>     | 5   | 63.5-63.6     | 4           | 1  | MARC0056621 | 134.9-134.9 | 0.00    | 0.03    | 0.03 | $-0.42 \pm 0.08$ | G  | 0.47 |
| <i>SLC25A17</i> | 5   | 4.8-4.8       | 1           | 7  | SIRI0000355 | 129.2-138.3 | 0.00    | 0.03    | 0.26 | $-0.64 \pm 0.13$ | A  | 0.18 |

<sup>1</sup>SSC: porcine chromosome, N: Number of SNPs significantly associated with traits under study, SNP: SNPs displaying the most significant associations with traits under study, Region (Mb): regions containing SNPs significantly associated with traits under study, P-value: nominal P-value, q-value: q-value calculated with a false discovery rate approach, B : Bonferroni-corrected P-value,  $\delta$ : allelic



effect and its standard error (SE), A1: minority allele, MAF: frequency of the minority allele.

Supplementary Table 1. List of 63 lipid-related genes analysed in the current work.

| <b>Ensembl ID</b>  | <b>Name</b>                                                                       | <b>Acronym</b> |
|--------------------|-----------------------------------------------------------------------------------|----------------|
| ENSSSCG00000026173 | ATP-binding cassette, sub-family A (ABC1), member 1                               | <i>ABCA1</i>   |
| ENSSSCG00000028620 | ATP-binding cassette, sub-family D (ALD), member 3                                | <i>ABCD3</i>   |
| ENSSSCG00000016156 | acyl-CoA dehydrogenase, long chain                                                | <i>ACADL</i>   |
| ENSSSCG00000003776 | acyl-CoA dehydrogenase, C-4 to C-12 straight chain                                | <i>ACADM</i>   |
| ENSSSCG00000009916 | acyl-CoA dehydrogenase, C-2 to C-3 short chain                                    | <i>ACADS</i>   |
| ENSSSCG00000008724 | acyl-CoA oxidase 3, pristanoyl                                                    | <i>ACOX3</i>   |
| ENSSSCG00000017566 | acyl-CoA synthetase family member 2                                               | <i>ACSF2</i>   |
| ENSSSCG00000015784 | acyl-CoA synthetase long-chain family member 1                                    | <i>ACSL1</i>   |
| ENSSSCG00000016223 | acyl-CoA synthetase long-chain family member 3                                    | <i>ACSL3</i>   |
| ENSSSCG00000012583 | acyl-CoA synthetase long-chain family member 4                                    | <i>ACSL4</i>   |
| ENSSSCG00000000757 | adiponectin receptor 2                                                            | <i>ADIPOR2</i> |
| ENSSSCG00000005829 | 1-acylglycerol-3-phosphate O-acyltransferase 2                                    | <i>AGPAT2</i>  |
| ENSSSCG00000015755 | 1-acylglycerol-3-phosphate O-acyltransferase 5                                    | <i>AGPAT5</i>  |
| ENSSSCG00000013599 | angiopoietin like 4                                                               | <i>ANGPTL4</i> |
| ENSSSCG00000030921 | apolipoprotein A1                                                                 | <i>APOA1</i>   |
| ENSSSCG00000003088 | apolipoprotein E                                                                  | <i>APOE</i>    |
| ENSSSCG00000016634 | caveolin 1, caveolae protein, 22kDa                                               | <i>CAV1</i>    |
| ENSSSCG00000016635 | caveolin 2                                                                        | <i>CAV2</i>    |
| ENSSSCG00000006276 | CCAAT/enhancer binding protein (C/EBP), delta                                     | <i>CEBPD</i>   |
| ENSSSCG00000010449 | cholesterol 25-hydroxylase                                                        | <i>CH25H</i>   |
| ENSSSCG00000004142 | Cbp/p300-interacting transactivator, with Glu/Asp rich carboxy-terminal domain, 2 | <i>CITED2</i>  |
| ENSSSCG00000002689 | c-Maf inducing protein                                                            | <i>CMIP</i>    |
| ENSSSCG00000015391 | carnitine O-octanoyltransferase                                                   | <i>CROT</i>    |
| ENSSSCG00000006126 | 2,4-dienoyl CoA reductase 1, mitochondrial                                        | <i>DECR1</i>   |
| ENSSSCG00000003854 | enoyl CoA hydratase domain containing 2                                           | <i>ECHDC2</i>  |
| ENSSSCG00000001000 | enoyl-CoA delta isomerase 2                                                       | <i>ECI2</i>    |
| ENSSSCG00000026044 | farnesyl-diphosphate farnesyltransferase 1                                        | <i>FDFT1</i>   |
| ENSSSCG00000010631 | glycerol-3-phosphate acyltransferase, mitochondrial                               | <i>GPAM</i>    |

|                    |                                                                                          |                |
|--------------------|------------------------------------------------------------------------------------------|----------------|
| ENSSSCG00000008569 | hydroxyacyl-CoA dehydrogenase/3-ketoacyl-CoA thiolase/enoyl-CoA hydratase , beta subunit | <i>HADHB</i>   |
| ENSSSCG00000016379 | high density lipoprotein binding protein                                                 | <i>HDLBP</i>   |
| ENSSSCG00000016872 | 3-hydroxy-3-methylglutaryl-CoA synthase 1 (soluble)                                      | <i>HMGCS1</i>  |
| ENSSSCG00000026025 | 3-hydroxymethyl-3-methylglutaryl-CoA lyase                                               | <i>HMGCL</i>   |
| ENSSSCG00000016420 | insulin induced gene 1                                                                   | <i>INSIG1</i>  |
| ENSSSCG00000010226 | jumonji domain containing 1C                                                             | <i>JMJD1C</i>  |
| ENSSSCG00000004569 | lactamase beta                                                                           | <i>LACTB</i>   |
| ENSSSCG00000010450 | lipase A, lysosomal acid, cholesterol esterase                                           | <i>LIPA</i>    |
| ENSSSCG00000003018 | lipase, hormone-sensitive                                                                | <i>LIPF</i>    |
| ENSSSCG00000004509 | lipase, endothelial                                                                      | <i>LIPG</i>    |
| ENSSSCG00000000625 | low density lipoprotein receptor-related protein 6                                       | <i>LRP6</i>    |
| ENSSSCG00000028960 | lanosterol synthase (2,3-oxidosqualene-lanosterol cyclase)                               | <i>LSS</i>     |
| ENSSSCG00000016918 | mitogen-activated protein kinase kinase kinase 1, E3 ubiquitin protein ligase            | <i>MAP3K1</i>  |
| ENSSSCG00000004454 | malic enzyme 1, NADP(+)-dependent, cytosolic                                             | <i>ME1</i>     |
| ENSSSCG00000024134 | monoglyceride lipase                                                                     | <i>MGLL</i>    |
| ENSSSCG00000025447 | MID1 interacting protein 1                                                               | <i>MIDIIP1</i> |
| ENSSSCG00000001063 | myosin regulatory light chain interacting protein                                        | <i>MYLIP</i>   |
| ENSSSCG00000008581 | nuclear receptor coactivator 1                                                           | <i>NCOA1</i>   |
| ENSSSCG00000003707 | Niemann-Pick disease, type C1                                                            | <i>NPC1</i>    |
| ENSSSCG00000002366 | Niemann-Pick disease, type C2                                                            | <i>NPC2</i>    |
| ENSSSCG00000016863 | 3-oxoacid CoA transferase 1                                                              | <i>OXCT1</i>   |
| ENSSSCG00000011215 | 3-oxoacyl-ACP synthase, mitochondrial                                                    | <i>OXSM</i>    |
| ENSSSCG00000001539 | peroxisome proliferator-activated receptor delta                                         | <i>PPARD</i>   |
| ENSSSCG00000011579 | peroxisome proliferator-activated receptor gamma                                         | <i>PPARG</i>   |
| ENSSSCG00000003837 | protein kinase, AMP-activated, alpha 2 catalytic subunit                                 | <i>PRKAA2</i>  |
| ENSSSCG00000000185 | protein kinase, AMP-activated, gamma 1 non-catalytic subunit                             | <i>PRKAG1</i>  |
| ENSSSCG00000016432 | protein kinase, AMP-activated, gamma 2 non-catalytic subunit                             | <i>PRKAG2</i>  |
| ENSSSCG00000026281 | SREBF chaperone                                                                          | <i>SCAP</i>    |
| ENSSSCG00000009759 | scavenger receptor class B, member 1                                                     | <i>SCARB1</i>  |
| ENSSSCG00000010554 | stearoyl-CoA desaturase (delta-9-                                                        | <i>SCD</i>     |

|                    |                                                     |                 |
|--------------------|-----------------------------------------------------|-----------------|
|                    | desaturase)                                         |                 |
| ENSSSCG00000010116 | solute carrier family 25 (mitochondrial carrier)    | <i>SLC25A1</i>  |
| ENSSSCG00000000072 | solute carrier family 25 (mitochondrial carrier)    | <i>SLC25A17</i> |
| ENSSSCG00000015232 | ST3 beta-galactoside alpha-2,3-sialyltransferase 4  | <i>ST3GAL4</i>  |
| ENSSSCG00000017402 | signal transducer and activator of transcription 5A | <i>STAT5A</i>   |
| ENSSSCG00000005229 | very low density lipoprotein receptor               | <i>VLDLR</i>    |
